# Supplementary material for: Enhanced thermal stability and lifetime of epoxy nanocomposites using covalently functionalized clay: experimental and modelling
Source: Royal Society of Chemistry journal article supplement (doi:10.1039/c4nj01768d), 2015-01-01
Supplement: c4nj01768d1.pdf [file c4nj01768d1.pdf]

## Supporting Information

# Enhanced thermal stability and lifetime of epoxy nanocomposites using covalently functionalized clay: Experimental and modelling

Omid Zabihi, Hamid Khayyam, Bronwyn Fox, Minoo Naebe\*

Institute for Frontier Materials, Deakin University, Geelong, Victoria, Australia

---

\*Corresponding author: Tel: +61469570372

E-mail: [minoo.naebe@deakin.edu.au](mailto:minoo.naebe@deakin.edu.au)

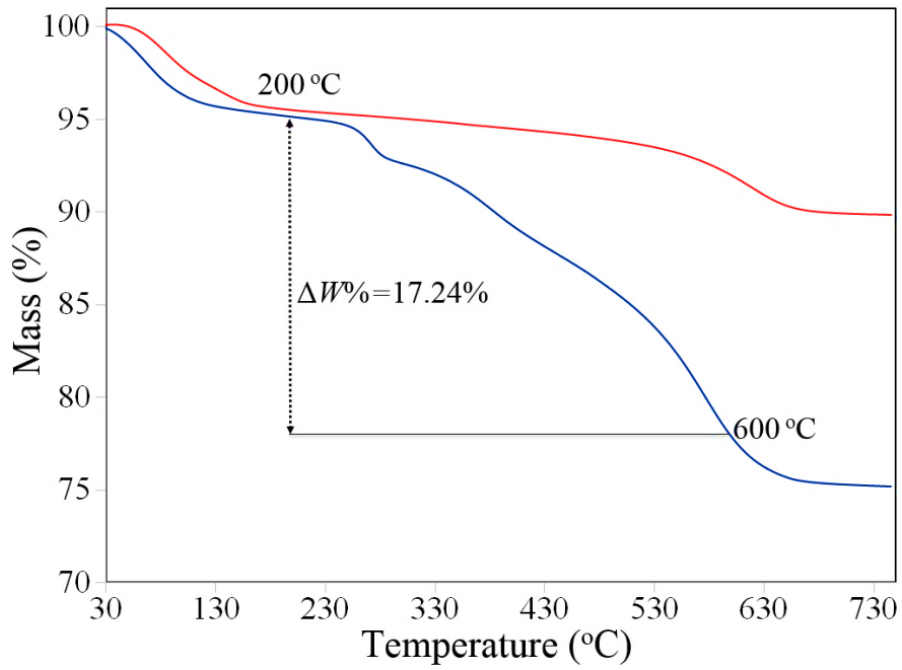

**Fig. S1.** TGA curves of pristine clay (top) and s-clay (bottom) at heating rate 10 °C/min.

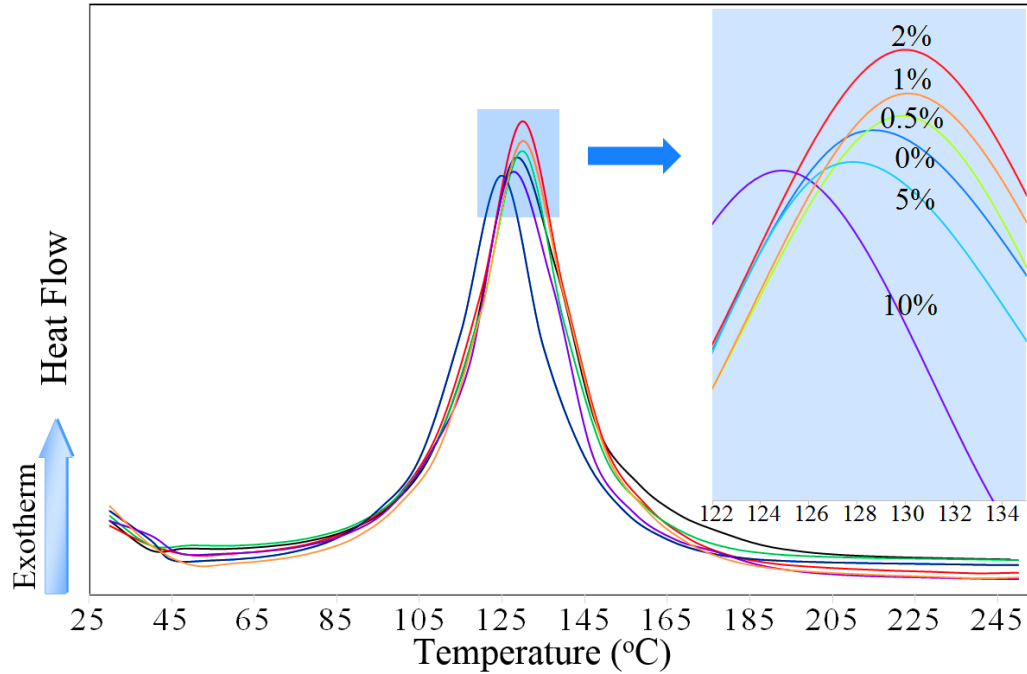

**Fig. S2.** DSC measurements on curing of epoxy nanocomposites in presence of various concentrations of s-clay.

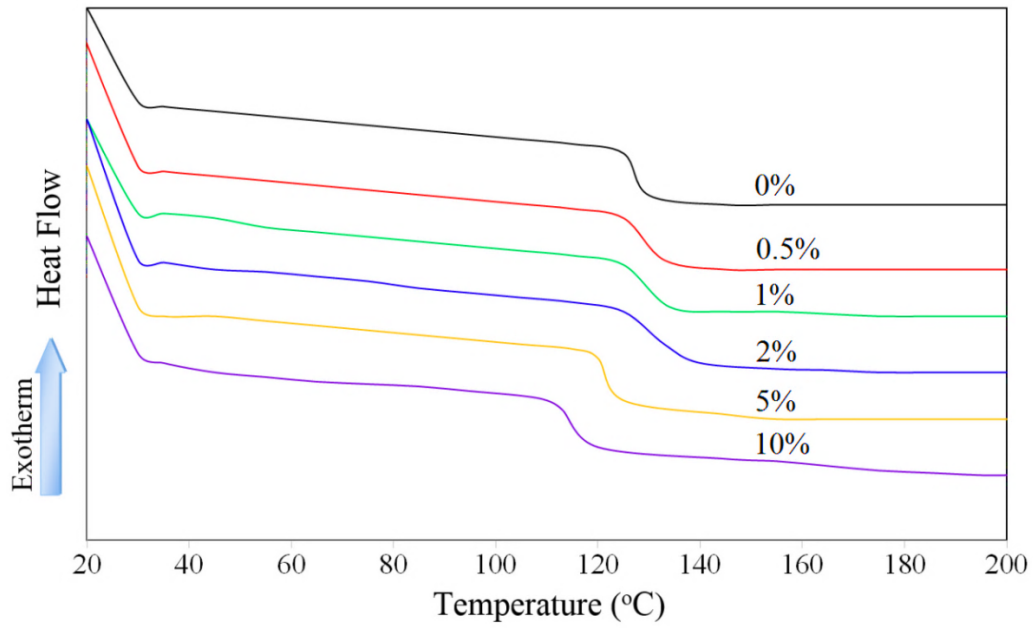

**Fig. S3.** DSC measurements on cured epoxy nanocomposites containing various concentrations of s-clay for determination of  $T_g$ .

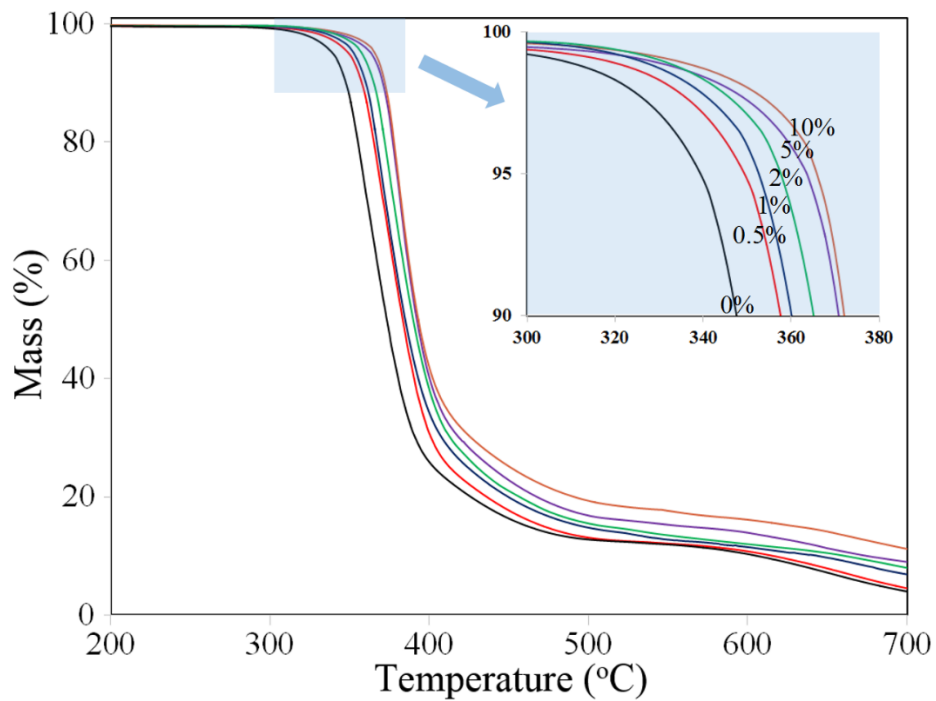

**Fig. S4.** TGA curves of epoxy nanocomposites containing various concentrations of s-clay.

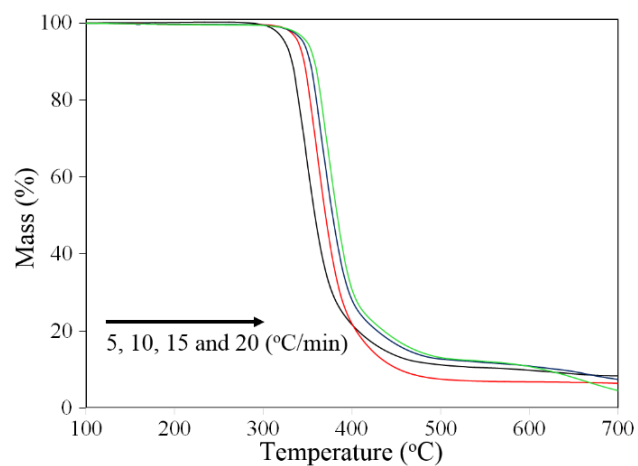

(a)

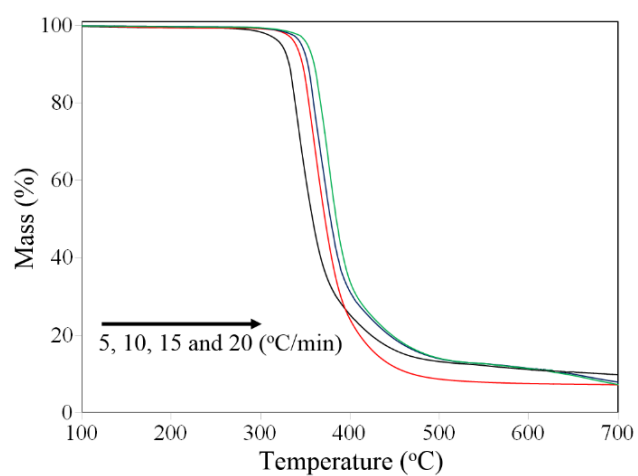

(b)

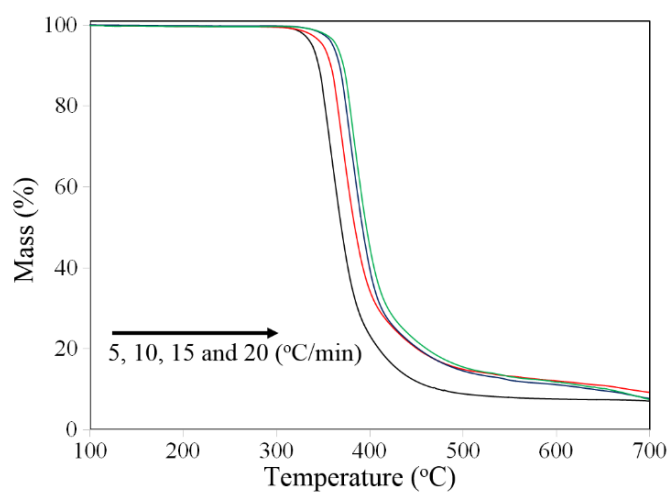

(c)

**Fig. S5.** TGA curves of the pure epoxy (a), epoxy/o-clay (b), and epoxy/s-clay (c) systems recorded at different heating rates.

**Table S1.** Algebraic expressions for  $f(\alpha)$  and  $g(\alpha)$  for the most frequently used mechanisms of solid state processes.

| Symbol         | $f(\alpha)$                               | $g(\alpha)$                      | Solid state processes                                          |
|----------------|-------------------------------------------|----------------------------------|----------------------------------------------------------------|
| A <sub>2</sub> | $2(1-\alpha) [-\ln(1-\alpha)]^{1/2}$      | $[-\ln(1-\alpha)]^{1/2}$         | Nucleation and growth (Avrami equation 1)                      |
| A <sub>3</sub> | $3(1-\alpha) [-\ln(1-\alpha)]^{2/3}$      | $[-\ln(1-\alpha)]^{1/3}$         | Nucleation and growth (Avrami equation 2 )                     |
| A <sub>4</sub> | $4(1-\alpha) [-\ln(1-\alpha)]^{3/4}$      | $[-\ln(1-\alpha)]^{1/4}$         | Nucleation and growth (Avrami equation 3 )                     |
| R <sub>1</sub> | 1                                         | $\alpha$                         | Phase boundary controlled reaction (one-dimensional movement)  |
| R <sub>2</sub> | $2(1-\alpha)^{1/2}$                       | $[1-(1-\alpha)^{1/2}]$           | Phase boundary controlled reaction (Contracting area)          |
| R <sub>3</sub> | $3(1-\alpha)^{2/3}$                       | $[1-(1-\alpha)^{1/3}]$           | Phase boundary controlled reaction (Contracting volume)        |
| D <sub>1</sub> | $1/2\alpha$                               | $\alpha^2$                       | One-dimensional diffusion                                      |
| D <sub>2</sub> | $[-\ln(1-\alpha)]^{-1}$                   | $(1-\alpha)\ln(1-\alpha)+\alpha$ | Two-dimensional diffusion                                      |
| D <sub>3</sub> | $3/2(1-\alpha)^{3/2}[1-(1-\alpha)^{1/3}]$ | $[1-(1-\alpha)^{1/3}]^2$         | Three-dimensional diffusion (Jander equation)                  |
| F <sub>1</sub> | $(1-\alpha)$                              | $-\ln(1-\alpha)$                 | Random nucleation with one nucleus on the individual particle  |
| F <sub>2</sub> | $(1-\alpha)^2$                            | $[1/(1-\alpha)]-1$               | Random nucleation with two nuclei on the individual particle   |
| F <sub>3</sub> | $(1-\alpha)^3$                            | $[-1+(1-\alpha)^{-2}]$           | Random nucleation with three nuclei on the individual particle |

**Table S2.** Activation energies obtained as a function of conversion during thermal degradation of the pure epoxy (a), epoxy/o-clay (b), and epoxy/s-clay (c) systems using the advanced isoconversional method.

| Conversion | $E_a$ (kJ mol <sup>-1</sup> ) |       |       |
|------------|-------------------------------|-------|-------|
|            | (a)                           | (b)   | (c)   |
| 0.05       | 134.2                         | 133.5 | 135.4 |
| 0.10       | 135.5                         | 136.4 | 136.2 |
| 0.15       | 135.7                         | 137.7 | 138.3 |
| 0.20       | 136.3                         | 139.1 | 140.4 |
| 0.25       | 137.1                         | 142.3 | 151.7 |
| 0.30       | 138.0                         | 152.2 | 173.5 |
| 0.35       | 141.6                         | 161.1 | 191.2 |
| 0.40       | 142.5                         | 176.2 | 212.3 |
| 0.45       | 143.3                         | 191.7 | 225.0 |
| 0.50       | 144.3                         | 194.5 | 236.4 |
| 0.55       | 145.1                         | 192.8 | 237.0 |
| 0.60       | 146.6                         | 182.3 | 234.8 |
| 0.65       | 147.4                         | 173.2 | 221.7 |
| 0.70       | 148.0                         | 166.5 | 211.6 |
| 0.75       | 150.9                         | 158.0 | 202.6 |
| 0.80       | 151.4                         | 157.7 | 196.8 |
| 0.85       | 152.7                         | 156.8 | 193.7 |
| 0.90       | 152.2                         | 155.2 | 184.3 |
| 0.95       | 153.4                         | 154.1 | 186.8 |
